# Supplementary material
Source: Springer Nature journal article supplement (https://www.springermedizin.de/resource/supplementary/12958_2012_962_MOESM7_ESM.pdf/9566474)

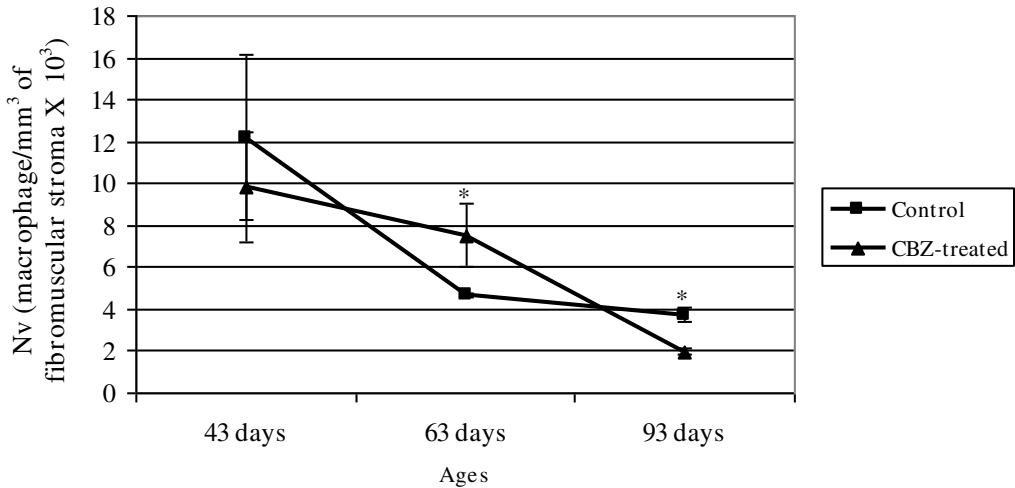

Supplement: MOESM7 [file 9566474]
